# Supplementary material
Source: PubMed Central journal article supplement (PMC5319880)
Supplement: NIHMS828405-supplement-Supp_info.pdf [file NIHMS828405-supplement-Supp_info.pdf]

**Supplementary Appendix Accompanying Manuscript**  
**Optimal Timing of Hepatitis C Treatment for Patients on the Liver Transplant Waiting List**

Jagpreet Chhatwal, PhD,<sup>1,2,3</sup> Sumeyye Samur, PhD<sup>1,2</sup> Brian Kues, PhD,<sup>4</sup> Turgay Ayer, PhD,<sup>4</sup> Mark S. Roberts, MD, MPP,<sup>5,6</sup> Fasiha Kanwal, MD, MSHS,<sup>7,8</sup> Chin Hur, MD, MPH<sup>1,2,3</sup> Drew Michael S. Donnell, MS,<sup>5,6</sup> Raymond T. Chung, MD<sup>2,3</sup>

<sup>1</sup>Massachusetts General Hospital Institute for Technology Assessment, Boston, MA

<sup>2</sup>Harvard Medical School, Boston, MA

<sup>3</sup>Liver Center and Gastrointestinal Division, Massachusetts General Hospital, Boston, MA

<sup>4</sup>Department of Industrial and Systems Engineering, Georgia Institute of Technology, Atlanta, GA

<sup>5</sup>Department of Health Policy and Management, University of Pittsburgh Graduate School of Public Health, Pittsburgh, PA

<sup>6</sup>University of Pittsburgh School of Medicine, Pittsburgh, PA

<sup>7</sup>Department of Medicine, Gastroenterology and Hepatology, Baylor College of Medicine, Houston, TX

<sup>8</sup>Houston Veterans Affairs Health Services Research and Development Center of Excellence, Michael E. DeBakey Veterans Affairs Medical Center, Houston, TX

**Funding/Support:** This study was supported in part by the National Center for Advancing Translational Sciences of the National Institutes of Health under award number KL2TR000146 and by Health Resources and Services Administration contract 234-2005-37011C. Dr. Chung was supported in part by NIH DK078772 and the MGH Research Scholars Program. Dr. Kanwal's effort was supported in part by the VA HSR&D Center for Innovations in Quality, Effectiveness and Safety (#CIN 13-413). Dr. Ayer's effort was supported in part by the National Science Foundation under award number 1452999. The content is the responsibility of the authors alone and does not necessarily reflect the views or policies of the sponsors.

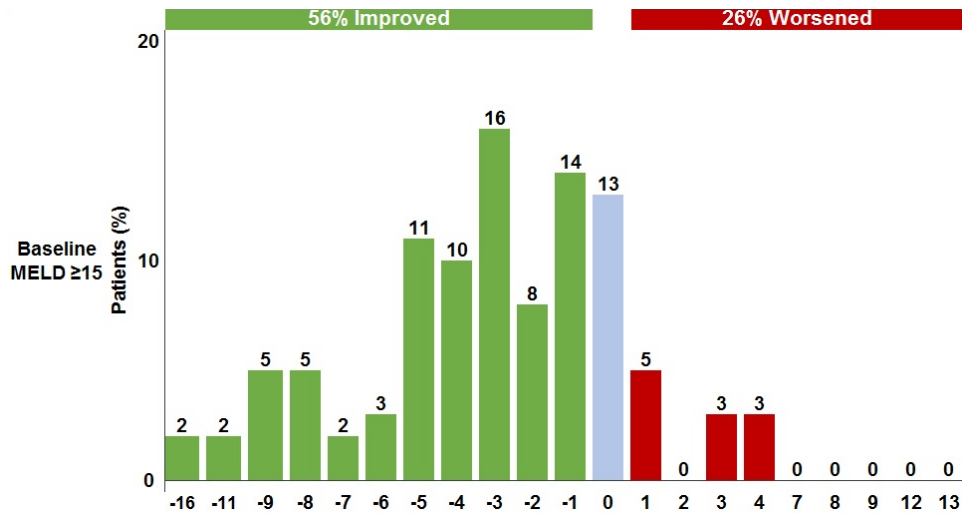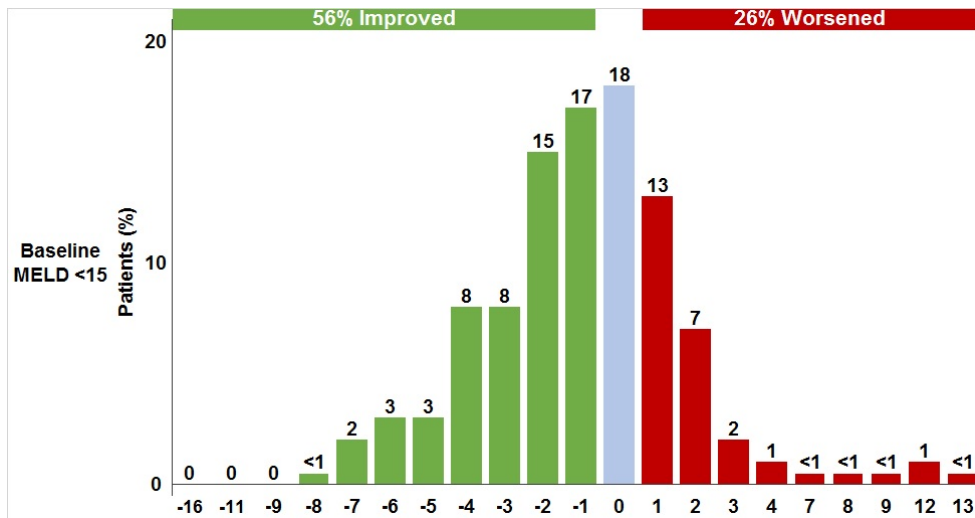

**Figure S1. Change in MELD scores because of HCV treatment in decompensated cirrhosis patients on the live transplant waiting list.** The top panel shows percentage change in patients having MELD score  $\geq 15$  and the bottom panel in patients having MELD  $< 15$ . For example, if a patient having MELD 20 achieves SVR, the likelihood of her MELD score will remain unchanged is 13%, will decrease to 19 is 14%, will increase to 21 is 5%, etc.  
Source: SOLAR 1 and 2 trials (1-3).

**Table S1. Annual mortality on the liver transplant waiting list**

| <b>MELD Score</b> | <b>Annual Mortality</b> |
|-------------------|-------------------------|
| 6-7               | 0.000014                |
| 8-9               | 0.000697                |
| 10-11             | 0.000691                |
| 12-13             | 0.000022                |
| 14-15             | 0.000681                |
| 16-17             | 0.000235                |
| 18-19             | 0.003659                |
| 20-21             | 0.007021                |
| 22-23             | 0.009891                |
| 24-25             | 0.011323                |
| 26-27             | 0.047260                |
| 28-29             | 0.078599                |
| 30-31             | 0.159678                |
| 32-33             | 0.192294                |
| 34-35             | 0.211013                |
| 36-37             | 0.273120                |
| 38-39             | 0.344884                |
| 40                | 0.481372                |

Source: Alagoz et al. (4) and UNOS data

**Table S2. Three-month Liver Transplantation Probabilities based on MELD score**

| <b>MELD Score</b> | <b>90-day Probability of Liver Transplant</b> |
|-------------------|-----------------------------------------------|
| <14               | 0                                             |
| 14–15             | 0.008161                                      |
| 16–17             | 0.012561                                      |
| 18–19             | 0.026286                                      |
| 20–21             | 0.036498                                      |
| 22–23             | 0.052484                                      |
| 24–25             | 0.066997                                      |
| 26–27             | 0.078408                                      |
| 28–29             | 0.082616                                      |
| 30–31             | 0.084809                                      |
| 32–33             | 0.087066                                      |
| 34–35             | 0.084809                                      |
| 36–37             | 0.068787                                      |
| 38–39             | 0.066997                                      |
| 40                | 0.052484                                      |

Source: Massie et al. (5)

## **S1. Mean waiting time and mortality while on the transplant waiting list after a graft failure**

After a graft failure, patients entered the transplant waiting list. Because we did not know their MELD score, we assigned the average probability of liver transplant and liver-related mortality to these patients, which were estimated from UNOS data. Specifically, standard statistical estimates of waiting times for liver transplantation were obtained from the UNOS STAR database. From the initial dataset (n = 220,598), we restricted the cohort to adult registrants (at least 18 years of age) with a diagnosis at listing of HCV who listed for transplantation between January 2006 and June 2010. Expert clinical evaluation of a previously developed classification of end-stage liver diseases guided the inclusion criterion for the diagnoses of HCV (6). Subsequently, we selected the subset of registrants who underwent a solid liver transplant or died while waiting, defined by the UNOS removal codes. Patients who previously received a solid organ transplant of any type were then excluded. The final cohort provided an aggregate sample of 9,701 adult registrants. We found that the mean time on the transplant waiting list was 155 days, and mean time to liver-related death was 240 days. Using the mean time, we estimated the probability of liver transplant and death in patients on the waiting list using the following formula:

$$weekly = 1 - \frac{mean\ days}{7} \sqrt{1/2}$$

The weekly probability of death and liver transplant in patients having graft failure was estimated as 0.020 and 0.0308, respectively. The corresponding annual probabilities were 0.652 and 0.805, respectively.

**Table S3. Health-Related Quality-of-Life Utilities of the United States Population**

| <b>Age Group</b> | <b>Male</b> | <b>Female</b> |
|------------------|-------------|---------------|
| 20–29            | 0.928       | 0.913         |
| 30–39            | 0.918       | 0.893         |
| 40–49            | 0.887       | 0.863         |
| 50–59            | 0.861       | 0.837         |
| 60–69            | 0.84        | 0.811         |
| 70–79            | 0.802       | 0.771         |
| 80–89            | 0.782       | 0.724         |

Source: Hanmer et al.(7)

## Section S2. Transplant Rate and Mortality by UNOS Region

We used UNOS-reported transplantation and death rates for each region to adjust the probability of receiving a LT and probability of death on the waiting list. Particularly, we estimated the ratio of observed transplant rate of each region and overall rate in the United States. Using the ratio, we estimated region-specific rates as follow:  $Transplant-Region = (1 - Transplant-U.S.)^{Ratio-Region}$

**Table S4.** Transplantation Rates by UNOS Region

| Region      | Transplantation<br>(Rate per 100<br>Person Years) | Ratio (Region /<br>U.S.) | Death (Rate<br>per 100 Person<br>Years) | Ratio (Region /<br>U.S.) |
|-------------|---------------------------------------------------|--------------------------|-----------------------------------------|--------------------------|
| 1           | 30.5                                              | 0.709                    | 19                                      | 1.061                    |
| 2           | 34                                                | 0.791                    | 18.4                                    | 1.028                    |
| 3           | 110.2                                             | 2.563                    | 20.1                                    | 1.123                    |
| 4           | 29.8                                              | 0.693                    | 15.9                                    | 0.888                    |
| 5           | 28.7                                              | 0.667                    | 16.9                                    | 0.944                    |
| 6           | 50.5                                              | 1.174                    | 21.3                                    | 1.190                    |
| 7           | 47.8                                              | 1.112                    | 19.2                                    | 1.073                    |
| 8           | 37.9                                              | 0.881                    | 16                                      | 0.894                    |
| 9           | 26.4                                              | 0.614                    | 17.2                                    | 0.961                    |
| 10          | 68.8                                              | 1.600                    | 20                                      | 1.117                    |
| 11          | 76.9                                              | 1.788                    | 18.9                                    | 1.056                    |
| <b>U.S.</b> | <b>43.0</b>                                       |                          | <b>17.9</b>                             |                          |

**Table S5.** Liver Transplant Model Variables: Baseline Values, Ranges, and

Parameters for Distributions Used in Deterministic and Probabilistic Sensitivity Analyses

| Parameter                                                                  | Base Case | Range       | Distribution | Parameter 1 <sup>a</sup> | Parameter 1 <sup>b</sup> |
|----------------------------------------------------------------------------|-----------|-------------|--------------|--------------------------|--------------------------|
| <b><i>Sustained virologic response rate</i></b>                            |           |             |              |                          |                          |
| Pre-LT SVR rate                                                            | 0.840     | 0.700-0.930 | Beta         | 21.29                    | 4.05                     |
| Post-LT SVR rate                                                           | 0.950     | 0.900-0.980 | Beta         | 68.39                    | 3.60                     |
| <b><i>Transition probabilities</i></b>                                     |           |             |              |                          |                          |
| Liver transplant to liver-related death (3 months of 1 <sup>st</sup> LT)   | 0.124     | 0.118-0.129 | Beta         | 2069.63                  | 14620.96                 |
| Liver transplant to liver-related death (3 months of repeated LT)          | 0.264     | 0.240-0.287 | Beta         | 372.25                   | 1037.79                  |
| Liver transplant to graft failure (3 months of 1 <sup>st</sup> LT)         | 0.167     | 0.161-0.173 | Beta         | 2478.90                  | 12364.79                 |
| Liver transplant to graft failure (3 months of repeated LT)                | 0.312     | 0.287-0.336 | Beta         | 446.36                   | 984.28                   |
| Sustained virologic response to liver-related death (1 <sup>st</sup> year) | 0.110     | 0.082-0.137 | Beta         | 54.59                    | 441.72                   |
| Sustained virologic response to liver-related death (subsequent year)      | 0.032     | 0.024-0.04  | Beta         | 59.47                    | 1798.87                  |
| Sustained virologic response to graft failure                              | 0.050     | 0.037-0.062 | Beta         | 58.34                    | 1108.50                  |
| F0-F2 to liver-related death (1 <sup>st</sup> year of 1 <sup>st</sup> LT)  | 0.124     | 0.118-0.129 | Beta         | 2069.63                  | 14620.96                 |
| F0-F2 to liver-related death (Subsequent year of 1 <sup>st</sup> LT)       | 0.041     | 0.040-0.042 | Beta         | 6163.39                  | 144530.78                |
| F0-F2 to liver-related death (1 <sup>st</sup> year of repeated LT)         | 0.264     | 0.240-0.287 | Beta         | 372.25                   | 1037.79                  |
| F0-F2 to liver-related death (Subsequent year of repeated LT)              | 0.072     | 0.070-0.075 | Beta         | 2053.37                  | 26465.67                 |
| F3-F4 to liver-related death (1 <sup>st</sup> year of 1 <sup>st</sup> LT)  | 0.124     | 0.118-0.129 | Beta         | 2069.63                  | 14620.96                 |
| F3-F4 to liver-related death (Subsequent year of 1 <sup>st</sup> LT)       | 0.041     | 0.040-0.042 | Beta         | 6163.39                  | 144530.78                |
| F3-F4 to liver-related death (1 <sup>st</sup> year of repeated LT)         | 0.264     | 0.240-0.287 | Beta         | 372.25                   | 1037.79                  |
| F3-F4 to liver-related death (Subsequent year of repeated LT)              | 0.072     | 0.070-0.075 | Beta         | 2053.37                  | 26465.67                 |
| F0-F2 to graft failure (1 <sup>st</sup> year of 1 <sup>st</sup> LT)        | 0.167     | 0.161-0.173 | Beta         | 2478.90                  | 12364.79                 |
| F0-F2 to graft failure (1 <sup>st</sup> year of repeat LT)                 | 0.312     | 0.287-0.336 | Beta         | 446.36                   | 984.28                   |
| F3-F4 to graft failure (1 <sup>st</sup> year of 1 <sup>st</sup> LT)        | 0.290     | 0.315-0.525 | Beta         | 3.86                     | 9.46                     |
| F3-F4 to graft failure (1 <sup>st</sup> year of repeat LT)                 | 0.312     | 0.287-0.336 | Beta         | 446.36                   | 984.28                   |
| F0-F2 to graft failure (subsequent year of 1 <sup>st</sup> LT)             | 0.051     | 0.050-0.052 | Beta         | 9482.36                  | 176446.24                |
| F0-F2 to graft failure (subsequent year of repeat LT)                      | 0.095     | 0.093-0.098 | Beta         | 3486.21                  | 33210.74                 |



|                                                                   |       |             |      |         |           |
|-------------------------------------------------------------------|-------|-------------|------|---------|-----------|
| F3–F4 to graft failure<br>(subsequent year of 1 <sup>st</sup> LT) | 0.051 | 0.050-0.052 | Beta | 9482.36 | 176446.24 |
| F3–F4 to graft failure<br>(subsequent year of repeat LT)          | 0.095 | 0.093-0.098 | Beta | 3486.21 | 33210.74  |
| Graft failure to liver-related<br>death                           | 0.652 | 0.489-0.815 | Beta | 20.74   | 11.06     |
| Graft failure to repeat transplant                                | 0.805 | 0.604-1     | Beta | 11.96   | 2.90      |
| F0–F2 to F3–F4                                                    | 0.044 | 0.040-0.055 | Beta | 58.72   | 1275.76   |
| Decrease in transplant rate due<br>to achieving SVR               | 0.08  | 0.050-0.150 | Beta | 4.54    | 52.17     |
| <b>Health-related quality-of-life<br/>weights</b>                 |       |             |      |         |           |
| Transplant waiting list                                           | 0.800 | 0.570-0.990 | Beta | 12.82   | 3.21      |
| Liver transplant                                                  | 0.600 | 0.370-0.730 | Beta | 32.13   | 21.42     |
| F0–F2                                                             | 0.828 | 0.716-0.865 | Beta | 326.86  | 68.04     |
| F3–F4                                                             | 0.801 | 0.693-0.837 | Beta | 377.66  | 93.83     |
| Antiviral Treatment                                               | 0.890 | 0.770-0.930 | Beta | 208.31  | 25.75     |
| Sustained virologic response                                      | 0.890 | 0.770-0.930 | Beta | 208.31  | 25.75     |
| Graft failure                                                     | 0.800 | 0.570-0.990 | Beta | 12.82   | 3.21      |

<sup>a</sup> Parameter 1 corresponds to  $\alpha$  parameter for beta distribution

<sup>b</sup> Parameter 2 corresponds to  $\beta$  parameter for beta distribution

### Section S3. Validation of Transplant Survival Rates

We validated the predicted 1-year and 5-year transplant survival rates with those from Organ Procurement Transplant Network (OPTN) data. Because OPTN data provides survival rates in the pre-DAA era, we simulated the scenario using pre-DAA therapies. Specifically, we assumed that 20% of HCV patients after LT were eligible for HCV treatment with peginterferon-based therapies in the pre-DAA era. The SVR rate in post-LT patients was 23% (8).

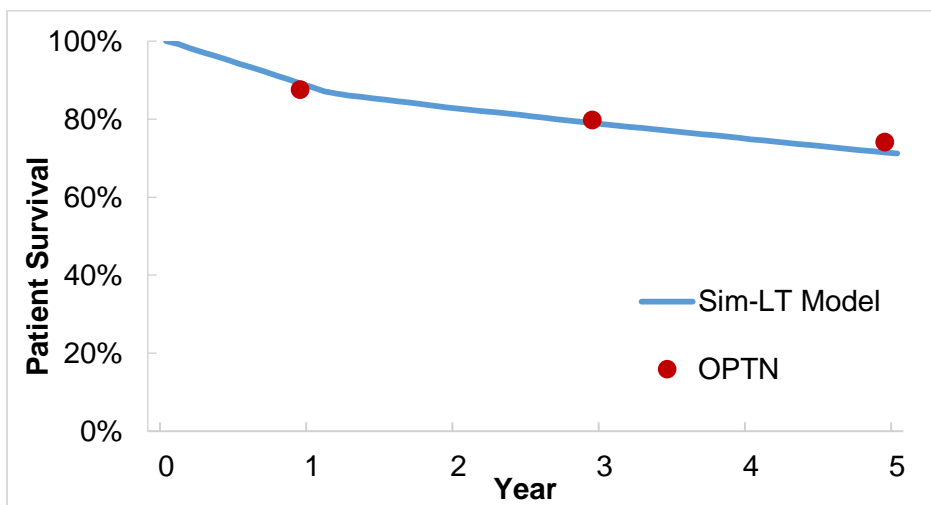

**Figure S2. Validation of model-predicted post-liver transplant patient survival with OPTN data**

## Section S4. Additional Model Outcomes

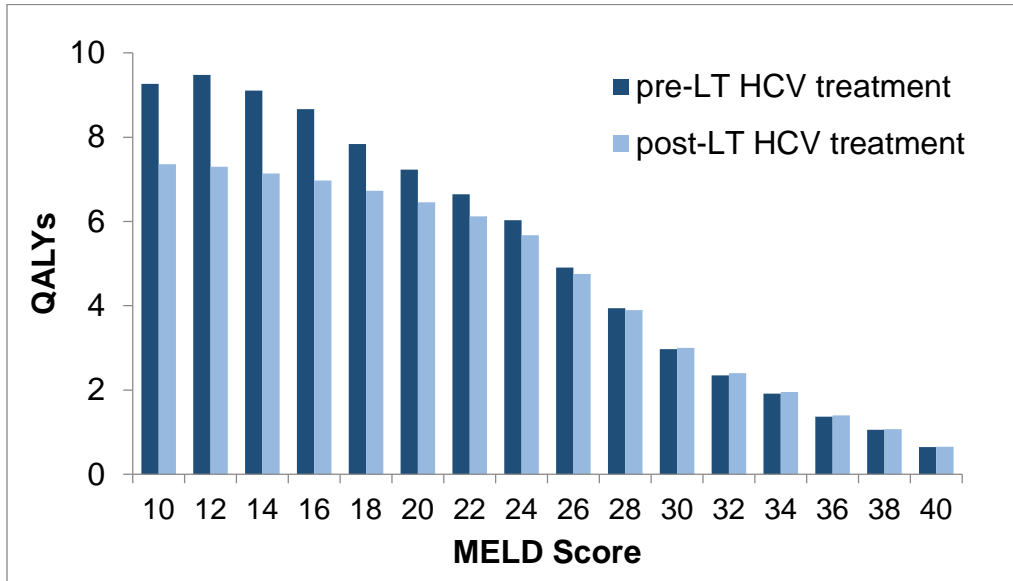

**Figure S3.** Comparison of quality-adjusted life years (QALYs) by MELD score under *pre-LT* versus *post-LT* treatment of hepatitis C in decompensated cirrhosis patients on the waiting list. Abbreviation: LT, liver transplant

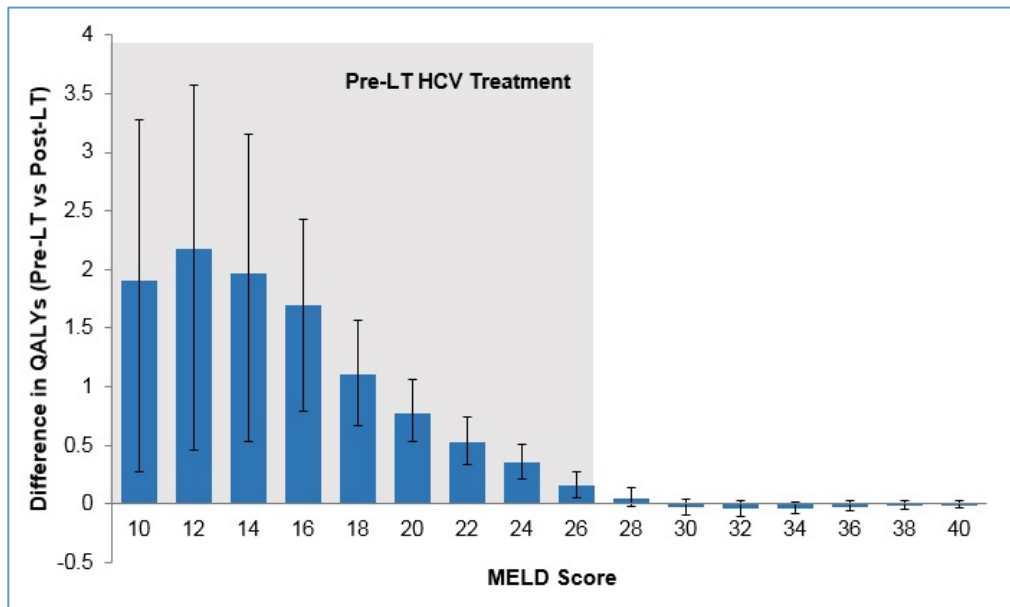

**Figure S4.** Difference in quality-adjusted life years (QALYs) if HCV is treated *pre-LT* versus *post-LT* in patients with decompensated cirrhosis on the transplant waiting list. The error bars represent 95% confidence interval generated by probabilistic sensitivity analysis. Patients having MELD  $\leq$  27 will benefit from pre-LT HCV treatment (shown by the shaded region).

The increase in the likelihood of receiving an LT in HCV-positive patients could be occurring at a different rate, we therefore conducted an addition analysis by increasing the likelihood of LT from the base case value to evaluate at what rate the decision to treat HCV would change.

**Figure S5** shows that the threshold MELD score to treat HCV pre-LT fell below 26 when the rate of LT in HCV+ patients increases by 10% (because the 95% CI in gain in life years with pre-LT HCV treatment does not remain positive). Similarly, we found that the threshold to treat HCV pre-LT changed to MELD score < 24 when the rate of LT in HCV+ patients increased by 40% (**Figure S6**).

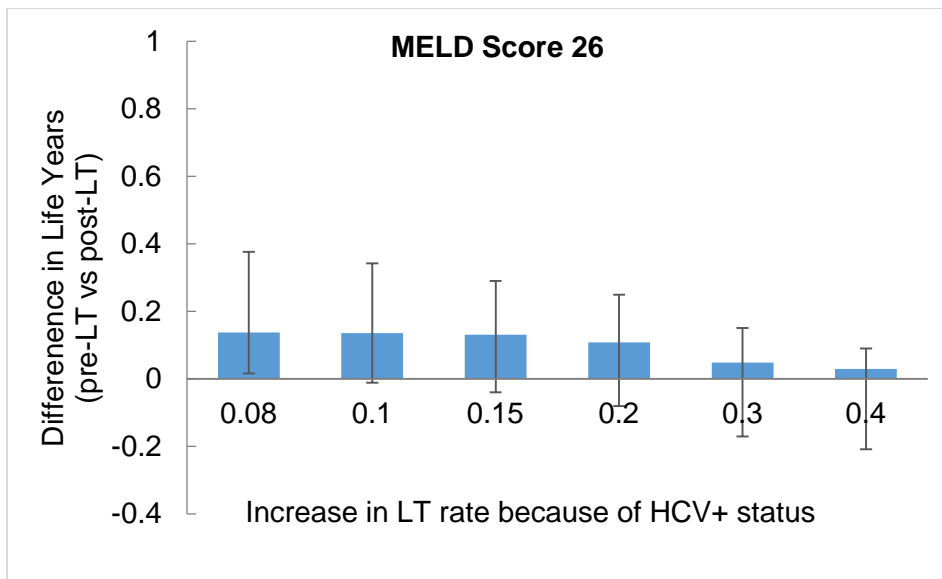

**Figure S5.** Difference in life years if HCV is treated *pre-LT* versus *post-LT* in patients with MELD score 26 on the transplant waiting list. The error bars represent 95% confidence interval generated by probabilistic sensitivity analysis.

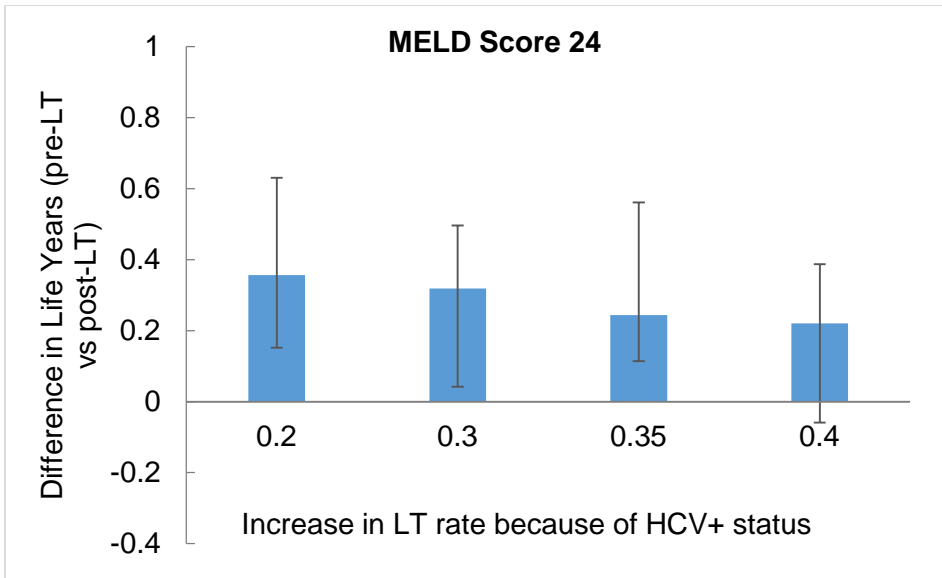

**Figure S6.** Difference in life years if HCV is treated *pre-LT* versus *post-LT* in patients with MELD score 24 on the transplant waiting list. The error bars represent 95% confidence interval generated by probabilistic sensitivity analysis.

## References

1. Charlton M, Everson GT, Flamm SL, Kumar P, Landis C, Brown RS, Jr., Fried MW, et al. Ledipasvir and Sofosbuvir Plus Ribavirin for Treatment of HCV Infection in Patients With Advanced Liver Disease. *Gastroenterology* 2015;149:649-659.
2. Manns M, Samuel D, Gane EJ, Mutimer D, McCaughan G, Buti M, Prieto M, et al. Ledipasvir and sofosbuvir plus ribavirin in patients with genotype 1 or 4 hepatitis C virus infection and advanced liver disease: a multicentre, open-label, randomised, phase 2 trial. *The Lancet Infectious Diseases*;16:685-697.
3. Gane E, Manns M, McCaughan G, Curry MP, Peck-Radosavljevic M, Vlierberghe HV, Arterburn S, et al. Ledipasvir/sofosbuvir with ribavirin in patients with decompensated cirrhosis or liver transplantation and HCV infection: SOLAR-1 and -2 trials. In: AASLD. Abstract 1049; 2015; 2015.
4. Alagoz O, Maillart LM, Schaefer AJ, Roberts MS. The optimal timing of living-donor liver transplantation. *Management Science* 2004;50:1420-1430.
5. Massie AB, Caffo B, Gentry SE, Hall EC, Axelrod DA, Lentine KL, Schnitzler MA, et al. MELD Exceptions and Rates of Waiting List Outcomes. *Am J Transplant* 2011;11:2362-2371.
6. Roberts MS, Angus DC, Bryce CL, Valenta Z, Weissfeld L. Survival after liver transplantation in the United States: a disease-specific analysis of the UNOS database. *Liver Transpl* 2004;10:886-897.
7. Hanmer J, Lawrence WF, Anderson JP, Kaplan RM, Fryback DG. Report of nationally representative values for the noninstitutionalized US adult population for 7 health-related quality-of-life scores. *Medical Decision Making* 2006;26:391-400.
8. Berenguer M. Systematic review of the treatment of established recurrent hepatitis C with pegylated interferon in combination with ribavirin. *J Hepatol* 2008;49:274-287.
